# Supplementary material for: Ultrastructure and Spectral Characteristics of the Compound Eye of Asiophrida xanthospilota (Baly, 1881) (Coleoptera, Chrysomelidae)
Source: MDPI journal article supplement (doi:10.3390/insects15070532), 2024-07-13
Supplement: s1 [file s1]

Table S1. Comparisons of rhabdom organization of ommatidia among representatives of Cucujiformia.

| Species                         | Family/<br>subfamily | Rhabdom<br>type | Relationship<br>between PR<br>and CR       | Arrangement<br>of PR | Arrangement<br>of CR | Contribution to<br>CR by R7 and R8 | Orientation of<br>microvilli in PR | Orientation of<br>microvilli in PR | Polarization<br>sensitivity | Reference                                    |
|---------------------------------|----------------------|-----------------|--------------------------------------------|----------------------|----------------------|------------------------------------|------------------------------------|------------------------------------|-----------------------------|----------------------------------------------|
| <i>Tbanasimus formicarius</i>   | Cleridae             | open            | contacted                                  | fused                | fused                | unequal                            | perpendicular                      | multiple                           | ?                           | Wachmann (1977) [2]                          |
| <i>Trichodes apiarius</i>       | Cleridae             | open            | isolated                                   | fused                | fused                | unequal                            | multiple                           | multiple                           | -                           | Wachmann (1977) [2]                          |
| <i>Clerus mutillarius</i>       | Cleridae             | open            | contacted<br>distally, isolated<br>basally | distally fused       | fused                | equal                              | parallel                           | multiple                           | -                           | Wachmann (1977) [2]                          |
| <i>Neotriplax lewisi</i>        | Erotylidae           | open            | contacted                                  | fused                | vertically aligned   | unequal                            | perpendicular                      | perpendicular                      | +                           | Mishra and Meyer-<br>Rochow (2006) [32]      |
| <i>Donacia simplex</i>          | Donaciinae           | open            | isolated                                   | fused                | fused                | equal                              | parallel                           | perpendicular                      | +                           | Wachmann (1977) [2]                          |
| <i>Lema lichenis</i>            | Crioerinae           | open            | isolated                                   | fused                | fused                | equal                              | parallel                           | multiple                           | -                           | Wachmann (1977) [2]                          |
| <i>Adoxus obscurus</i>          | Eumolpinae           | open            | isolated                                   | fused                | fused                | equal                              | parallel                           | multiple                           | -                           | Wachmann (1977) [2]                          |
| <i>Orsodacne cerasi</i>         | Orsodacninae         | open            | isolated                                   | fused                | fused                | unequal                            | multiple                           | multiple                           | -                           | Wachmann (1977) [2]                          |
| <i>Zeugopora flavicollis</i>    | Megalopodinae        | open            | isolated                                   | fused                | fused                | unequal                            | multiple                           | multiple                           | -                           | Wachmann (1977) [2]                          |
| <i>Cassida vibex</i>            | Hispinae             | open            | isolated                                   | fused                | fused                | equal                              | multiple                           | multiple                           | -                           | Wachmann (1977) [2]                          |
| <i>Clytra laeviuscula</i>       | Clytrinae            | open            | isolated                                   | fused                | fused                | equal                              | perpendicular                      | multiple                           | ?                           | Wachmann (1977) [2]                          |
| <i>Agelastica alni</i>          | Galerucinae          | open            | isolated                                   | fused                | fused                | unequal                            | multiple                           | multiple                           | -                           | Wachmann (1977) [2]                          |
| <i>Agasicles hygrophila</i>     | Galerucinae          | open            | isolated                                   | fused                | fused                | unequal                            | multiple                           | multiple                           | -                           | Fan et al. (2023) [14]                       |
| <i>Asiophrida xanthospilota</i> | Galerucinae          | open            | isolated                                   | fused                | segmented            | R8 absent                          | multiple                           | multiple                           | -                           | current study                                |
| <i>Callosobruchus maculatus</i> | Bruchinae            | open            | isolated                                   | fused                | fused                | equal                              | multiple                           | multiple                           | -                           | Du et al. (2023) [13]                        |
| <i>Melasoma aenea</i>           | Chrysomelinae        | open            | isolated                                   | fused                | fused                | equal                              | parallel                           | perpendicular                      | +                           | Wachmann (1977) [2]                          |
| <i>Chrysomela varians</i>       | Chrysomelinae        | open            | contacted                                  | fused                | fused                | equal                              | parallel                           | multiple                           | -                           | Wachmann (1977) [2]                          |
| <i>Phytodecta viminalis</i>     | Chrysomelinae        | open            | contacted                                  | fused                | fused                | equal                              | parallel                           | multiple                           | -                           | Wachmann (1977) [2]                          |
| <i>Timarcha tenebricosa</i>     | Chrysomelinae        | open            | contacted                                  | fused                | segmented            | unequal                            | perpendicular                      | multiple                           | ?                           | Wachmann (1977) [2]                          |
| <i>Anaglyptus mysticus</i>      | Cerambycinae         | open            | isolated                                   | fused                | fused                | equal                              | parallel                           | multiple                           | -                           | Wachmann (1977) [2],<br>Wachmann (1979) [35] |

| Species                              | Family/<br>subfamily | Rhabdom<br>type | Relationship<br>between PR<br>and CR | Arrangement<br>of PR  | Arrangement<br>of CR | Contribution to<br>CR by R7 and R8 | Orientation of<br>microvilli in PR | Orientation of<br>microvilli in PR | Polarization<br>sensitivity | Reference                     |
|--------------------------------------|----------------------|-----------------|--------------------------------------|-----------------------|----------------------|------------------------------------|------------------------------------|------------------------------------|-----------------------------|-------------------------------|
| <i>Xylotrechus arvicola</i>          | Cerambycinae         | open            | isolated                             | fused                 | fused                | equal                              | parallel                           | multiple                           | -                           | Wachmann (1979) [35]          |
| <i>Plagionotus arcuatus</i>          | Cerambycinae         | open            | isolated                             | isolated              | fused                | equal                              | parallel                           | multiple                           | -                           | Wachmann (1979) [35]          |
| <i>Demonax transilis</i>             | Cerambycinae         | open            | isolated                             | isolated              | fused                | equal                              | parallel                           | multiple                           |                             | Gokan & Hosobuchi (1979) [34] |
| <i>Stenopterus ater</i>              | Cerambycinae         | open            | isolated                             | significantly reduced | fused                | unequal                            | multiple                           | multiple                           | -                           | Wachmann (1979) [35]          |
| <i>Anaglyptus mysticus</i>           | Cerambycinae         | open            | isolated                             | loosely fused         | fused                | equal                              | parallel                           | multiple                           | -                           | Wachmann (1979) [35]          |
| <i>Molorchus minor</i>               | Cerambycinae         | open            | contacted                            | fused                 | fused                | unequal                            | parallel                           | multiple                           | -                           | Wachmann (1979) [35]          |
| <i>Paraclytus exculus</i>            | Cerambycinae         | open            | contacted                            | fused                 | fused                | equal                              | parallel                           | multiple                           | -                           | Gokan & Hosobuchi (1979) [34] |
| <i>Strangalia nigra</i>              | Lepturinae           | open            | isolated                             | isolated              | fused                | equal                              | parallel                           | multiple                           | -                           | Wachmann (1979) [35]          |
| <i>Grammoptera sp.</i>               | Lepturinae           | open            | isolated                             | isolated              | fused                | equal                              | parallel                           | multiple                           | -                           | Wachmann (1979) [35]          |
| <i>Strangalia sp.</i>                | Lepturinae           | open            | isolated                             | isolated              | fused                | equal                              | parallel                           | multiple                           | -                           | Wachmann (1979) [35]          |
| <i>Leptura ochraceofasciata</i>      | Lepturinae           | open            | isolated                             | isolated              | fused                | equal                              | parallel                           | multiple                           | -                           | Gokan & Hosobuchi (1979) [34] |
| <i>Pidonia puziloi</i>               | Lepturinae           | open            | isolated                             | isolated              | fused                | equal                              | parallel                           | multiple                           | -                           | Gokan & Hosobuchi (1979) [34] |
| <i>Stenocorus meridianus</i>         | Lepturinae           | open            | isolated                             | isolated              | fused                | unequal                            | multiple                           | multiple                           | -                           | Wachmann (1979) [35]          |
| <i>Tetrops praeusta</i>              | Lamiinae             | /               | /                                    | completely absent     | fused                | equal                              | parallel                           | /                                  | -                           | Wachmann (1979) [35]          |
| <i>Dorcatypus tristis</i>            | Lamiinae             | open            | contacted                            | fused                 | segmented            | unequal                            | perpendicular                      | perpendicular                      | +                           | Wachmann (1979) [35]          |
| <i>Mesechthisfatus fujisanus</i>     | Lamiinae             | open            | contacted                            | fused                 | segmented            | unequal                            | perpendicular                      | perpendicular                      | +                           | Gokan & Hosobuchi (1979) [34] |
| <i>Agapanthia villosoviridescens</i> | Lamiinae             | open            | contacted                            | fused                 | fused                | equal                              | parallel                           | multiple                           | -                           | Wachmann (1979) [35]          |
| <i>Monochamus alternatus</i>         | Lamiinae             | open            | contacted                            | fused                 | fused                | equal                              | perpendicular                      | perpendicular                      | +                           | Wen et al. (2020) [6]         |
| <i>Nupserha marginalis</i>           | Lamiinae             | open            | isolated                             | fused                 | fused                | equal                              | parallel                           | multiple                           | -                           | Gokan & Hosobuchi (1979) [34] |

| Species                  | Family/<br>subfamily | Rhabdom<br>type | Relationship<br>between PR<br>and CR | Arrangement<br>of PR | Arrangement<br>of CR | Contribution to<br>CR by R7 and R8 | Orientation of<br>microvilli in PR | Orientation of<br>microvilli in PR | Polarization<br>sensitivity | Reference                        |
|--------------------------|----------------------|-----------------|--------------------------------------|----------------------|----------------------|------------------------------------|------------------------------------|------------------------------------|-----------------------------|----------------------------------|
| <i>Agapanthia cardui</i> | Lamiinae             | fused           | fused                                | fused                | fused                | equal                              | parallel                           | multiple                           | -                           | Wachmann (1979) [35]             |
| <i>Ergates faber</i>     | Prioninae            | open            | contacted                            | fused                | segmented            | equal                              | parallel                           | perpendicular                      | +                           | Wachmann (1979) [35]             |
| <i>Distenia gracilis</i> | Disteniinae          | open            | contacted                            | fused                | fused                | equal                              | parallel                           | multiple                           | -                           | Gokan & Hosobuchi<br>(1979) [34] |

Abbreviation: PR, peripheral rhabdomeres; CR, central rhabdomeres.
